# Supplementary material
Source: MDPI journal article supplement (https://www.mdpi.com/2073-4344/11/12/1502)
Supplement: s1 [file s1 › catalysts-1501407-supplementary.pdf]

# Insight into Composition and Intermediate Evolutions of Copper-Based Catalysts during Gas-Phase CO<sub>2</sub> Electroreduction to Multicarbon Oxygenates

Guihua Li <sup>1,2</sup>, Yonghui Zhao <sup>1</sup>, Jerry Pui Ho Li <sup>3</sup>, Wei Chen <sup>1,2,\*</sup>, Shoujie Li <sup>1</sup>, Xiao Dong <sup>1</sup>, Yanfang Song <sup>1</sup>, Yong Yang <sup>3,\*</sup>, Wei Wei <sup>2,3,\*</sup> and Yuhan Sun <sup>2,3,\*</sup>

<sup>1</sup> CAS Key Laboratory of Low-carbon Conversion Science and Engineering, Shanghai Advanced Research Institute, Chinese Academy of Sciences, Shanghai 201210, China; liguihua@sari.ac.cn (G.L.); zhaoyh@sari.ac.cn (Y.Z.); lishoujie@sari.ac.cn (J.L.); dongxiao@sari.ac.cn (X.D.); songyf@sari.ac.cn (Y.S.)

<sup>2</sup> University of the Chinese Academy of Sciences, Beijing 100049, China

<sup>3</sup> School of Science and Technology, ShanghaiTech University, Shanghai 201210, China jerryli\_@hotmail.com (J.L.)

\* Correspondence: chenw@sari.ac.cn (W.C.); yangyong@shanghaitech.edu.cn (Y.Y.); weiwei@sari.ac.cn (W.W.); sunyh@sari.ac.cn (Y.S.); Tel.: +86-21-20350954 (W.C.); +86-21-20608005 (Y.S.); Fax: +86-21-20350867 (W.C.); +86-21-20350867 (Y.S.)

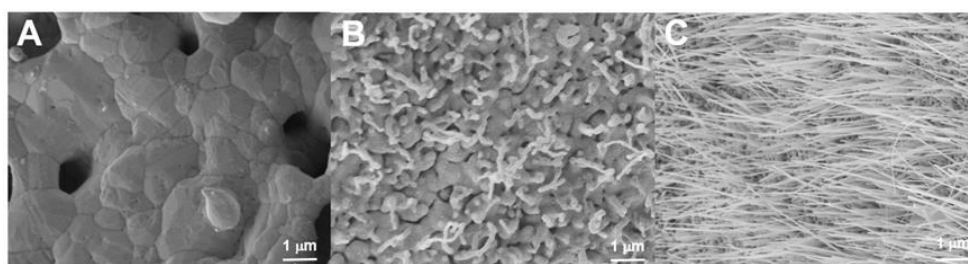

**Figure S1.** SEM images of (A) Cu foam, (B) Cu<sub>2</sub>O NWs, and (C) CuO NWs.

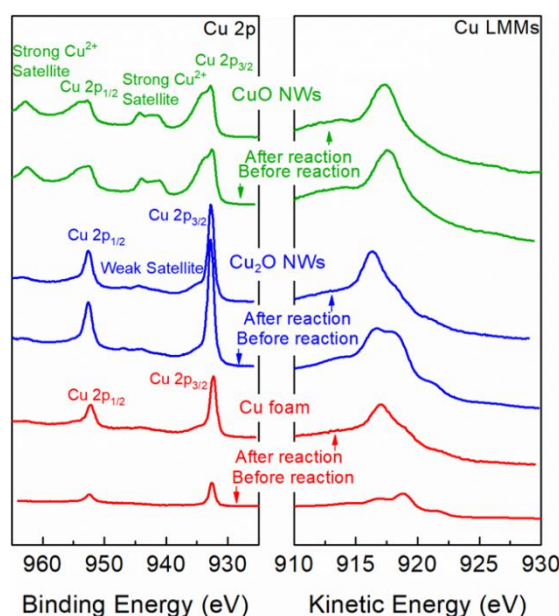

**Figure S2.** Cu 2p and Cu LMMs spectra of Cu-based catalysts: Cu foam, Cu<sub>2</sub>O NWs and CuO NWs before and after one-hour gas-phase CO<sub>2</sub> electroreduction.

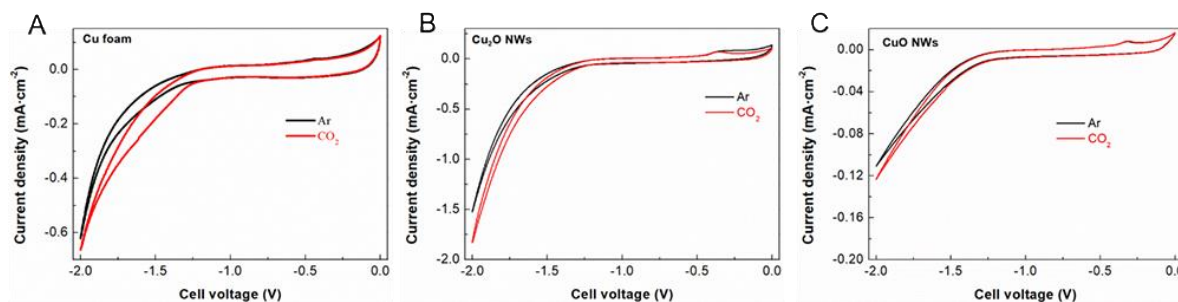

**Figure S3.** CV curves of (A) Cu foam, (B)  $\text{Cu}_2\text{O}$  NWs and (C) CuO NWs in Ar and  $\text{CO}_2$  atmosphere saturated with water vapor in the cell voltage range from 0 V to -2.0 V.

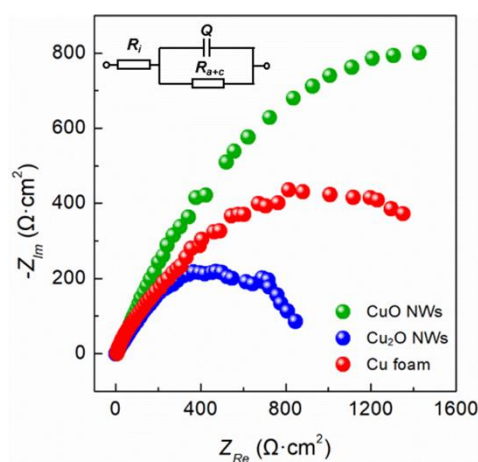

**Figure S4.** EIS spectra of Cu foam,  $\text{Cu}_2\text{O}$  NWs and CuO NWs in water vapor-saturated  $\text{CO}_2$ . Inset: the corresponding equivalent circuit.

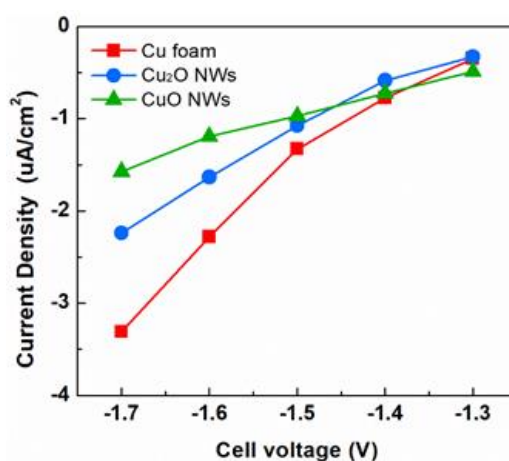

**Figure S5.** Current densities of gas-phase  $\text{CO}_2$  electroreduction over Cu-based catalysts (Cu foam,  $\text{Cu}_2\text{O}$  NWs and CuO NWs) at the different cell voltages in the range of -1.3 V to -1.7 V.

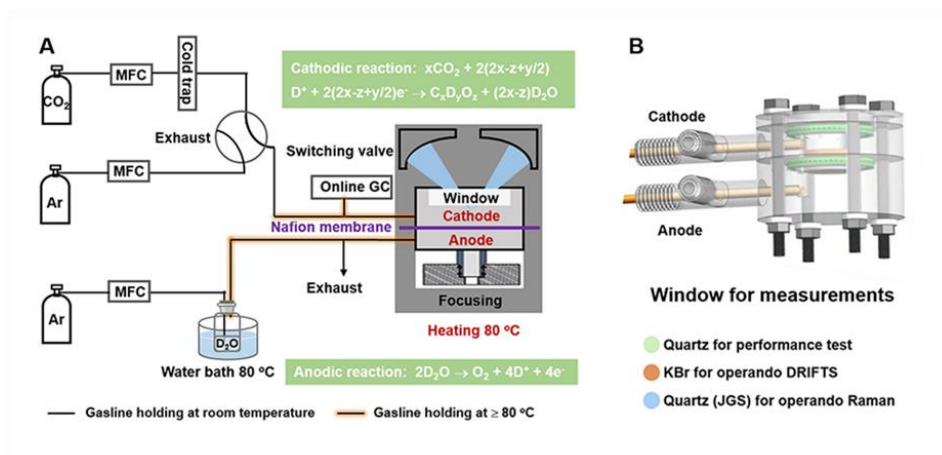

**Figure S6.** (A) Illustration of operando DRIFTS and Raman measurements system and (B) Home-made H-cell reactor of gas-phase CO<sub>2</sub> electroreduction and operando characterizations. (performance test with quartz, operando DRIFTS with KBr window and operando Raman with quartz window, respectively).

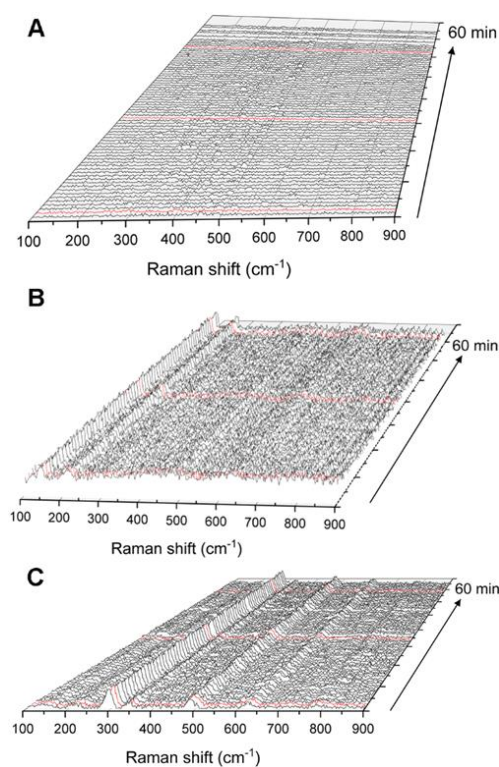

**Figure S7.** Operando Raman spectra of (A) Cu foam, (B) Cu<sub>2</sub>O NWs and (C) CuO NWs for CO<sub>2</sub> electroreduction at -1.6 V for 1 h, respectively.

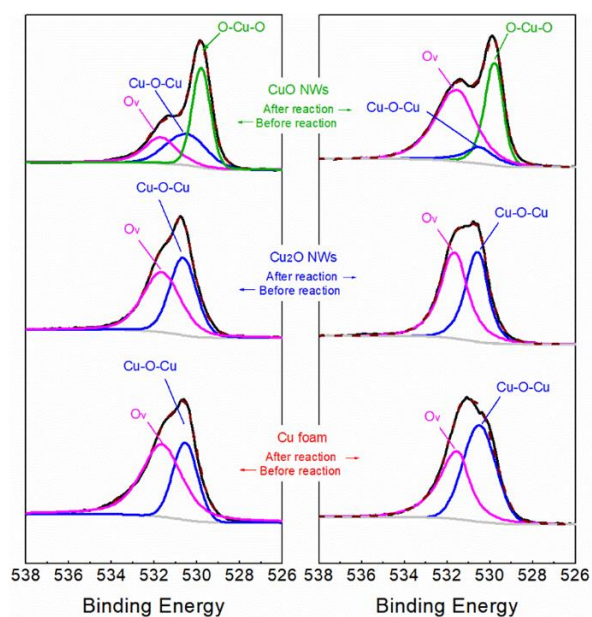

**Figure S8.** O 1s spectra of Cu-based catalysts: Cu foam, Cu<sub>2</sub>O NWs and CuO NWs before and after one-hour gas-phase CO<sub>2</sub> electroreduction.

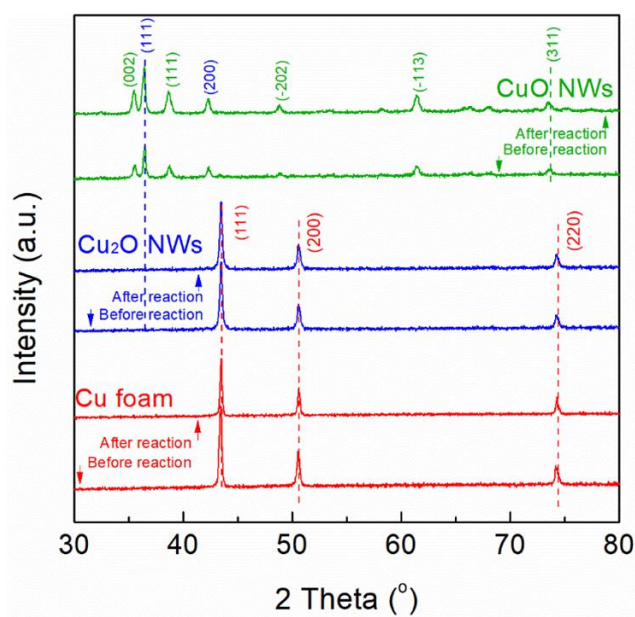

**Figure S9.** XRD patterns of Cu-based catalysts: Cu foam, Cu<sub>2</sub>O NWs and CuO NWs before and after one-hour gas-phase CO<sub>2</sub> electroreduction.

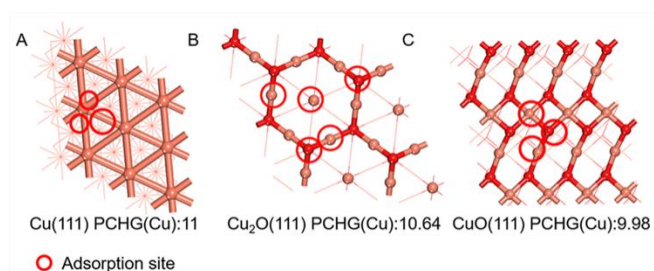

**Figure S10.** Surface-structure models of (A) Cu (111), (B) Cu<sub>2</sub>O (111), and (C) CuO (111) surfaces, respectively.

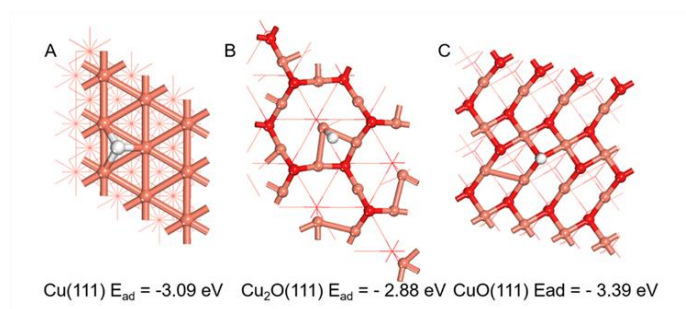

**Figure S11.** Relative adsorption energy of  $\text{H}^*$  on (A) Cu (111), (B)  $\text{Cu}_2\text{O}$  (111), and (C) CuO (111) surfaces, respectively.

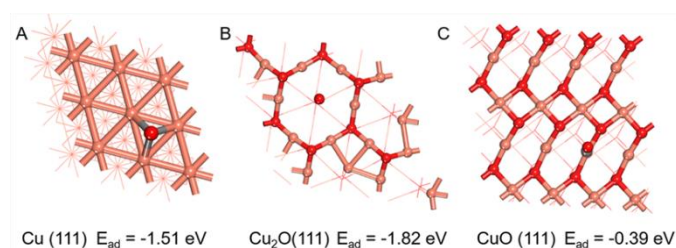

**Figure S12.** Relative adsorption energy of  $^*\text{CO}$  on (A) Cu (111), (B)  $\text{Cu}_2\text{O}$  (111), and (C) CuO (111) surfaces, respectively.

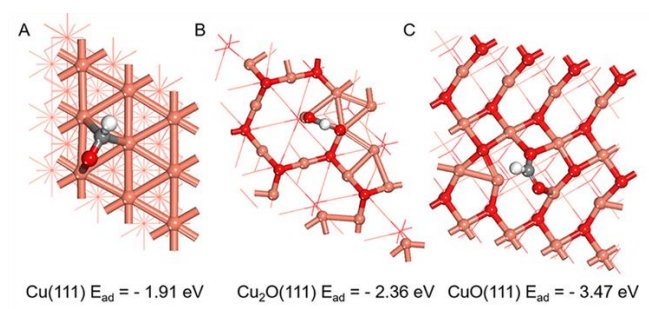

**Figure S13.** Relative adsorption energy of  $\text{HCO}^*$  on (A) Cu (111), (B)  $\text{Cu}_2\text{O}$  (111), and (C) CuO (111) surfaces, respectively.

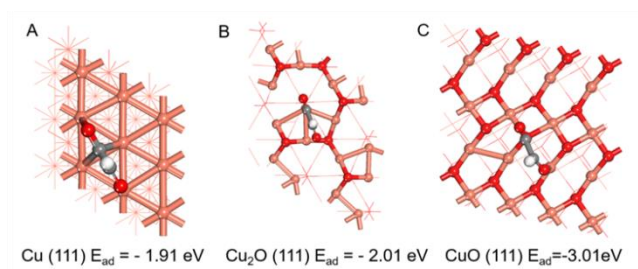

**Figure S14.** Relative adsorption energy of COCHO on (A) Cu (111), (B)  $\text{Cu}_2\text{O}$  (111), and (C) CuO (111) surfaces, respectively.

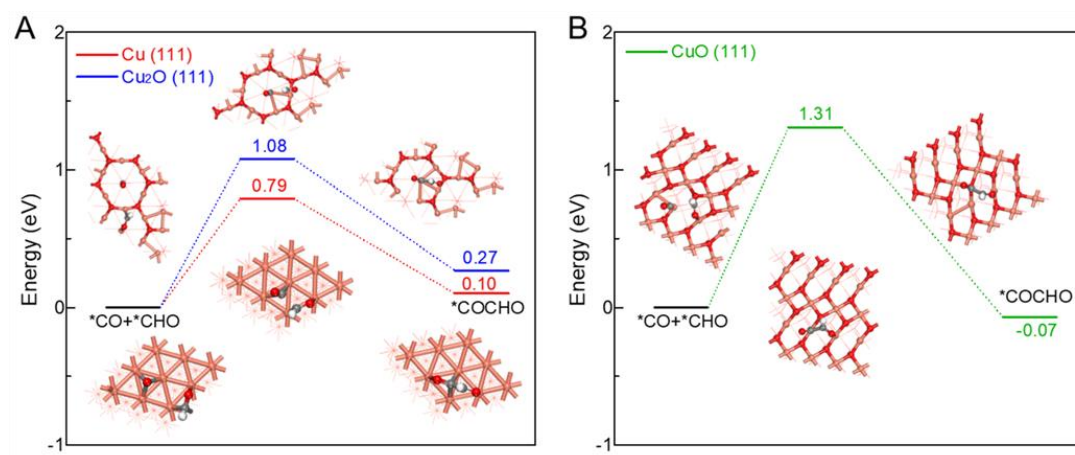

**Figure S15.** Activation barriers and reaction energies of  $\text{CO}^* + \text{HCO}^* \rightarrow \text{COCHO}^*$  on (A) Cu (111) surface and Cu<sub>2</sub>O(111), respectively, and (B) CuO(111) surface.

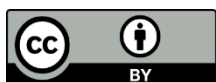

© 2021 by the authors. Submitted for possible open access publication under the terms and conditions of the Creative Commons Attribution (CC BY) license (<http://creativecommons.org/licenses/by/4.0/>).
